# Supplementary material
Source: PubMed Central journal article supplement (PMC4775135)
Supplement: supp_pp.15.01784_PP2015-01784DR3_Supplemental_Material.pdf [file supp_pp.15.01784_PP2015-01784DR3_Supplemental_Material.pdf]

# Supplemental Data

**Figure S1**

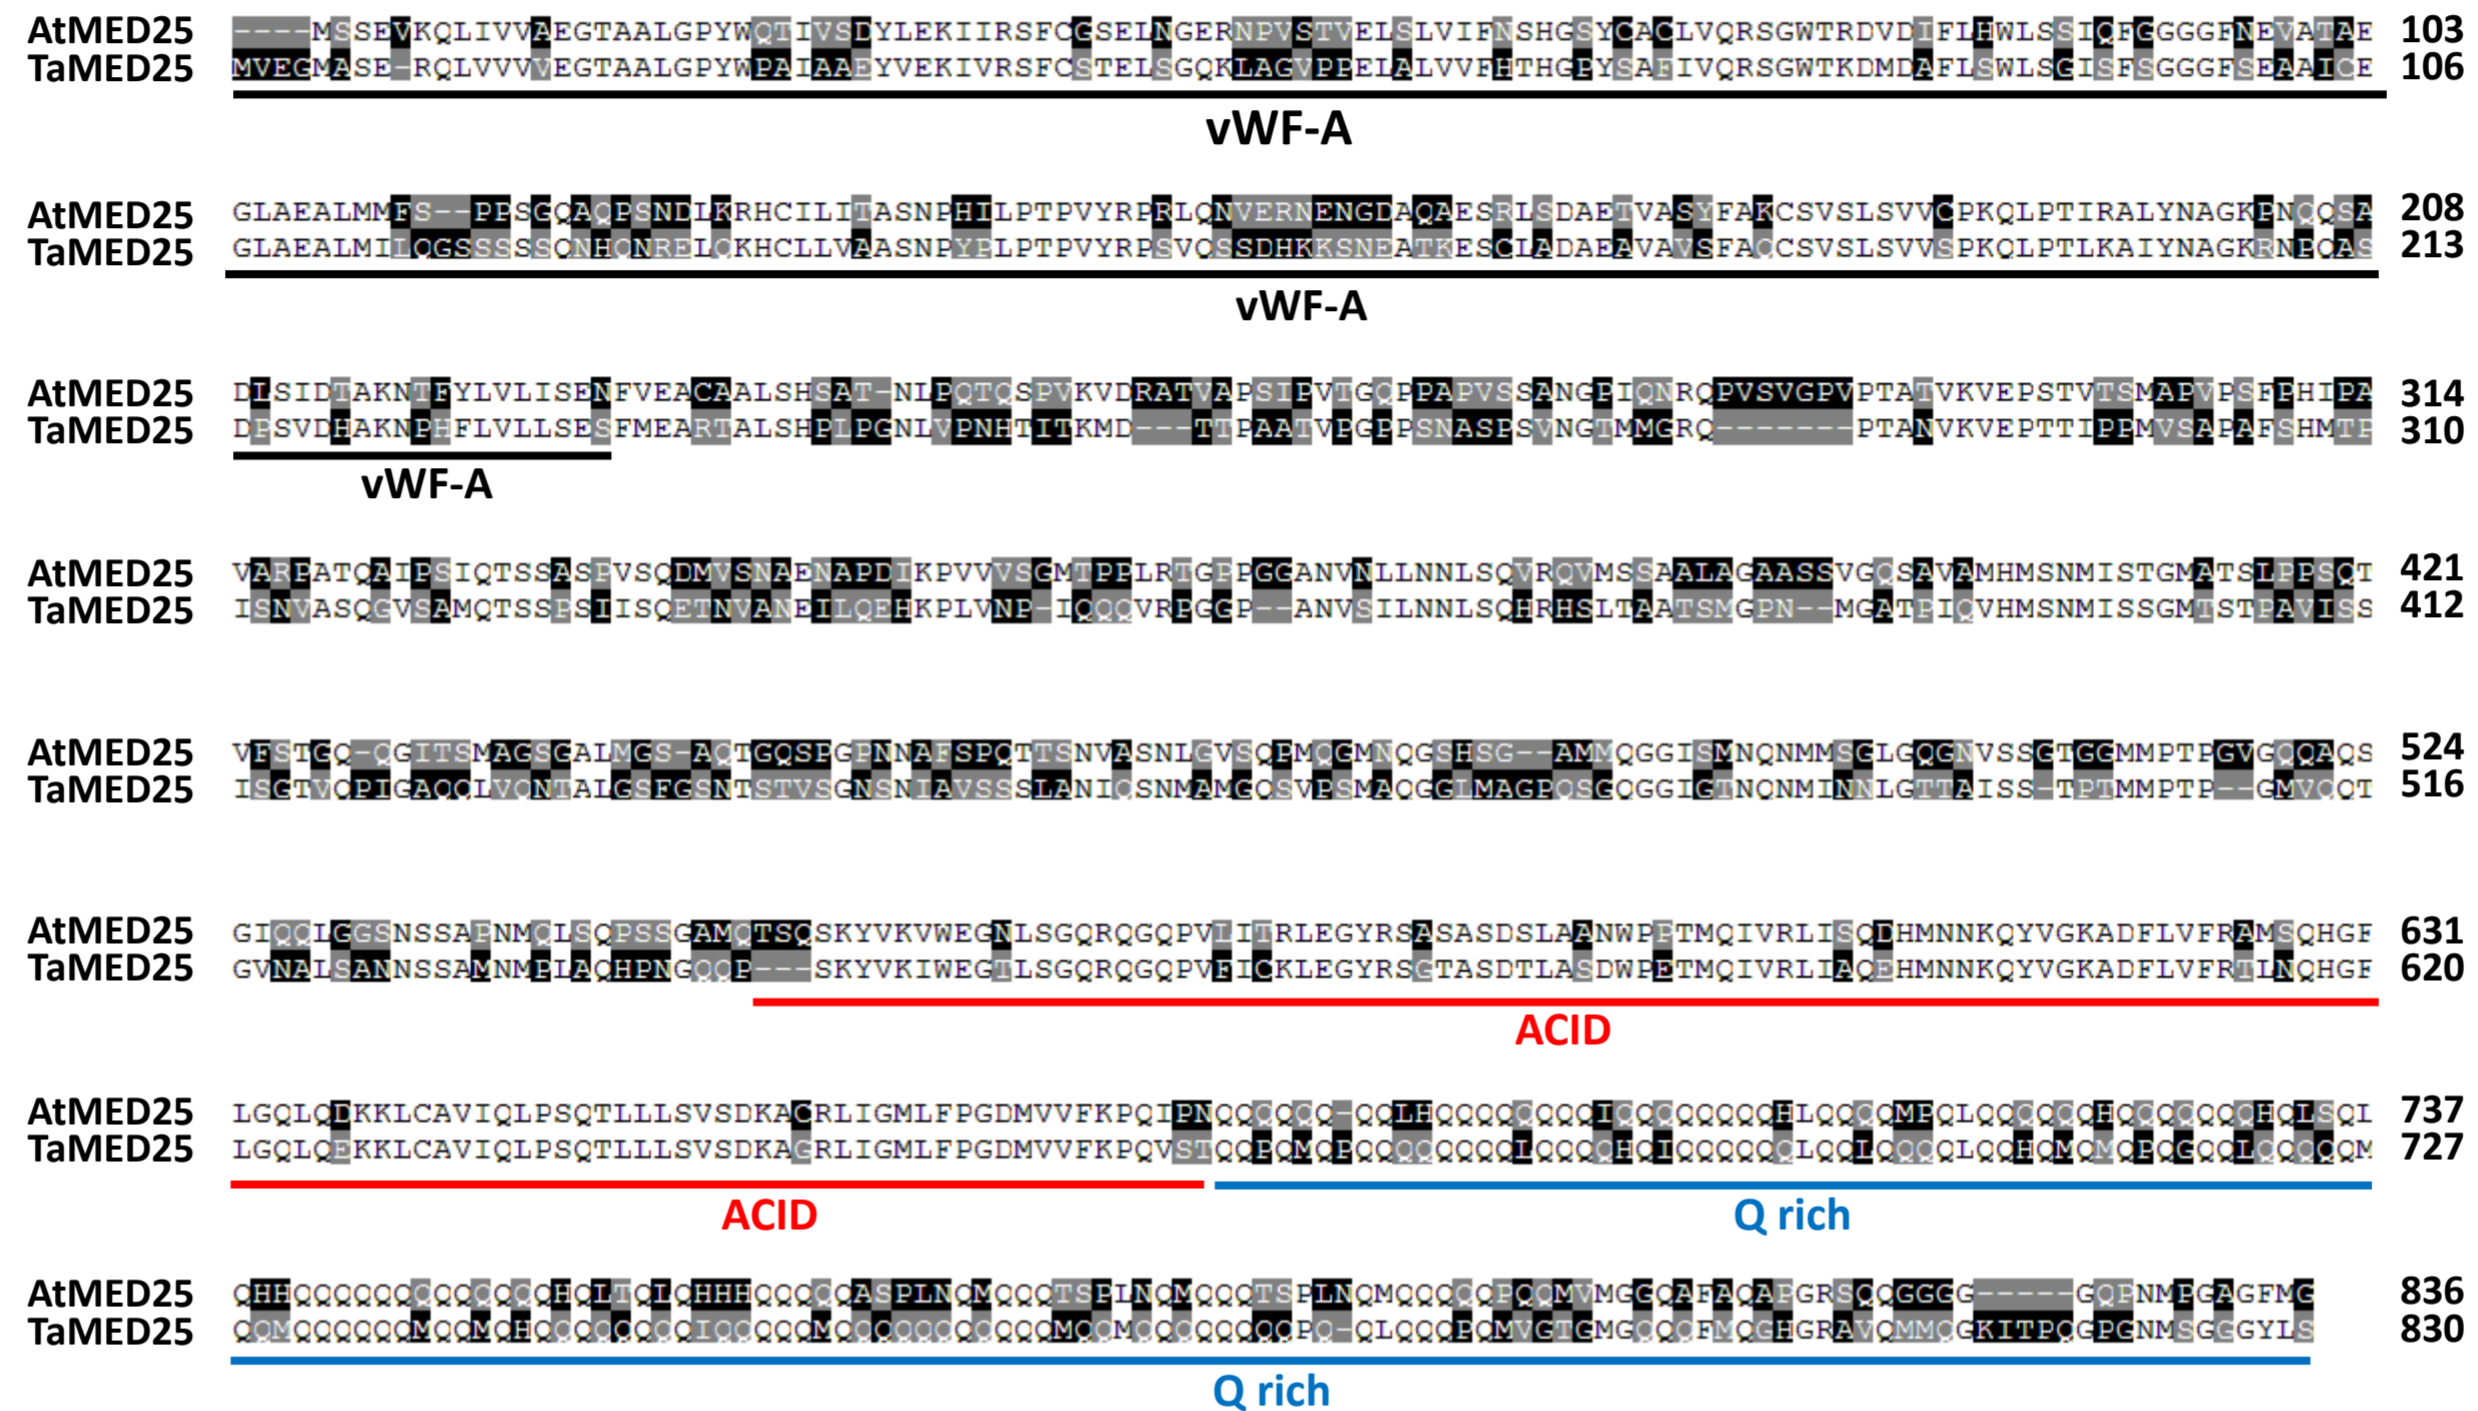

**Figure S1.** Sequence comparison of AtMED25 and TaMED25 proteins. TaMED25 is homologous to *Arabidopsis* AtMED25 (NP\_173925) with 52% sequence identity. The conserved vWF-A, ACID and Q-rich domains are separately underlined by black, red and blue lines. Residues that are not identical between the two proteins are shaded in dark or gray.



# Figure S2

|                   |                                                                                                              |             |
|-------------------|--------------------------------------------------------------------------------------------------------------|-------------|
| <b>TaMED25-A:</b> | ATGGTGGAGGGGATGGCTTCGGAGAGGCAGCTGGTGGTGGTCGTTGAGGGCACGGCGCGCTGGGGCCCTACTGGCCCGCCATTGCGGCCGAGTACGTGAGAAAGATCG | <b>109</b>  |
| <b>TaMED25-B:</b> | ATGGTGGAGGGGATGGCTTCGGAGAGGCAGCTGGTGGTGGTCGTTGAGGGCACGGCGCGCTGGGGCCCTACTGGCCCGCCATTGCGGCCGAGTACGTGAGAAAGATCG | <b>109</b>  |
| <b>TaMED25-D:</b> | ATGGTGGAGGGGATGGCTTCGGAGAGGCAGCTGGTGGTGGTCGTTGAGGGCACGGCGCGCTGGGGCCCTACTGGCCCGCCATTGCGGCCGAGTACGTGAGAAAGATCG | <b>109</b>  |
|                   |                                                                                                              |             |
| <b>TaMED25-A:</b> | TTCCGAGTTTTTGTCTACTGAAGTATCAGGGCAGAAGCTTGCAGGGGTACCACCTGAGCTTGCAATTAGTTGTCTCCATACCCAGGACCTACAGTGCCTTTATTGT   | <b>218</b>  |
| <b>TaMED25-B:</b> | TTCCGAGTTTTTGTCTACTGAAGTATCAGGGCAGAAGCTTGCAGGGGTACCACCTGAGCTTGCAATTAGTTGTCTCCATACCCAGGACCTACAGTGCCTTTATTGT   | <b>218</b>  |
| <b>TaMED25-D:</b> | TTCCGAGTTTTTGTCTACTGAAGTATCAGGGCAGAAGCTTGCAGGGGTACCACCTGAGCTTGCAATTAGTTGTCTCCATACCCAGGACCTACAGTGCCTTTATTGT   | <b>218</b>  |
|                   |                                                                                                              |             |
| <b>TaMED25-A:</b> | ACAACGCAGCGGTTGGACAAAAGATATGGATGCTTTTCTTTCATGGTTATCAGGAATATCATTAGTGGTGGAGGCTTCAGTGAAGTGTATTTGTGAAGTCTTGCT    | <b>327</b>  |
| <b>TaMED25-B:</b> | ACAACGCAGCGGTTGGACAAAAGATATGGATGCTTTTCTTTCATGGTTATCAGGAATATCATTAGTGGTGGAGGCTTCAGTGAAGTGTATTTGTGAAGTCTTGCT    | <b>327</b>  |
| <b>TaMED25-D:</b> | ACAACGCAGCGGTTGGACAAAAGATATGGATGCTTTTCTTTCATGGTTATCAGGAATATCATTAGTGGTGGAGGCTTCAGTGAAGTGTATTTGTGAAGTCTTGCT    | <b>327</b>  |
|                   |                                                                                                              |             |
| <b>TaMED25-A:</b> | GAAGCACTGATGATACTCCAAGGCAGTCTCTGTAGCAGCCAGAATCATCAAAATCGTGAACCTCAAAGCATTCGCTACTTGTGTGCAAGTAATCCTTACCCGCTGC   | <b>436</b>  |
| <b>TaMED25-B:</b> | GAAGCACTGATGATACTCCAAGGCAGTCTCTGTAGCAGCCAGAATCATCAAAATCGTGAACCTCAAAGCATTCGCTACTTGTGTGCAAGTAATCCTTACCCGCTGC   | <b>436</b>  |
| <b>TaMED25-D:</b> | GAAGCACTGATGATACTCCAAGGCAGTCTCTGTAGCAGCCAGAATCATCAAAATCGTGAACCTCAAAGCATTCGCTACTTGTGTGCAAGTAATCCTTACCCGCTGC   | <b>436</b>  |
|                   |                                                                                                              |             |
| <b>TaMED25-A:</b> | CTACACCTGTCTACCGCCCTTCTGTTCAAAGTAGTGATCACAAAAGAGCAACGAGCAACAAAGGAATCATGTCTTGTGATGCTGAGGCTGTGCAAGTCTCATTTC    | <b>545</b>  |
| <b>TaMED25-B:</b> | CTACACCTGTCTACCGCCCTTCTGTTCAAAGTAGTGATCACAAAAGAGCAACGAGCAACAAAGGAATCATGTCTTGTGATGCTGAGGCTGTGCAAGTCTCATTTC    | <b>545</b>  |
| <b>TaMED25-D:</b> | CTACACCTGTCTACCGCCCTTCTGTTCAAAGTAGTGATCACAAAAGAGCAACGAGCAACAAAGGAATCATGTCTTGTGATGCTGAGGCTGTGCAAGTCTCATTTC    | <b>545</b>  |
|                   |                                                                                                              |             |
| <b>TaMED25-A:</b> | TCAGTCTCTGTCTCTTTGTCGGTGGTATCTCTTAAACAGCTACCAACACTGAAGCAATATACAACGGGGAAAGAGGAATCCTCAAGCTTCTGATCCATCAGTTGAT   | <b>654</b>  |
| <b>TaMED25-B:</b> | TCAGTCTCTGTCTCTTTGTCGGTGGTATCTCTTAAACAGCTACCAACACTGAAGCAATATACAACGGGGAAAGAGGAATCCTCAAGCTTCTGATCCATCAGTTGAT   | <b>654</b>  |
| <b>TaMED25-D:</b> | TCAGTCTCTGTCTCTTTGTCGGTGGTATCTCTTAAACAGCTACCAACACTGAAGCAATATACAACGGGGAAAGAGGAATCCTCAAGCTTCTGATCCATCAGTTGAT   | <b>654</b>  |
|                   |                                                                                                              |             |
| <b>TaMED25-A:</b> | CATGCCAAAATCCACATTTTCTGTTTTGCTCTCTGAGAGTTTTCATGGAGGCTCGAAGCTCTAAGCCATCCTTTACCCGGGAACCTTGTCCCAAAACACACCATTA   | <b>763</b>  |
| <b>TaMED25-B:</b> | CATGCCAAAATCCACATTTTCTGTTTTGCTCTCTGAGAGTTTTCATGGAGGCTCGAAGCTCTAAGCCATCCTTTACCCGGGAACCTTGTCCCAAAACACACCATTA   | <b>763</b>  |
| <b>TaMED25-D:</b> | CATGCCAAAATCCACATTTTCTGTTTTGCTCTCTGAGAGTTTTCATGGAGGCTCGAAGCTCTAAGCCATCCTTTACCCGGGAACCTTGTCCCAAAACACACCATTA   | <b>763</b>  |
|                   |                                                                                                              |             |
| <b>TaMED25-A:</b> | CAAAAATGGATACCCACCTGCAGCTACTGTGCCAGGACCACCTTCGAATGCCATCCCTCAGTGAATGGAAACGATGATGGGACGGCAACCGACTGCAATGTTAAAGT  | <b>872</b>  |
| <b>TaMED25-B:</b> | CAAAAATGGATACCCACCTGCAGCTACTGTGCCAGGACCACCTTCGAATGCCATCCCTCAGTGAATGGAAACGATGATGGGACGGCAACCGACTGCAATGTTAAAGT  | <b>872</b>  |
| <b>TaMED25-D:</b> | CAAAAATGGATACCCACCTGCAGCTACTGTGCCAGGACCACCTTCGAATGCCATCCCTCAGTGAATGGAAACGATGATGGGACGGCAACCGACTGCAATGTTAAAGT  | <b>872</b>  |
|                   |                                                                                                              |             |
| <b>TaMED25-A:</b> | GGAGCCACAACTATACCACCAATGGTTTCTGCACCTGCATCTCTCATATGACACCTATTTCAAATGTGCTTCTCAAGGTGATCAGCAATGCAAACTTCTTACCA     | <b>981</b>  |
| <b>TaMED25-B:</b> | GGAGCCACAACTATACCACCAATGGTTTCTGCACCTGCATCTCTCATATGACACCTATTTCAAATGTGCTTCTCAAGGTGATCAGCAATGCAAACTTCTTACCA     | <b>981</b>  |
| <b>TaMED25-D:</b> | GGAGCCACAACTATACCACCAATGGTTTCTGCACCTGCATCTCTCATATGACACCTATTTCAAATGTGCTTCTCAAGGTGATCAGCAATGCAAACTTCTTACCA     | <b>981</b>  |
|                   |                                                                                                              |             |
| <b>TaMED25-A:</b> | TCGATTATTTTCAAGAAACAAATGTTGCAATGAAATATTGCAAGAGCATAAGCCTTTAGTAAACCTTATCCAACACAGGTTCCGGCTGGTGGCCAGCAAAATGTTA   | <b>1090</b> |
| <b>TaMED25-B:</b> | TCGATTATTTTCAAGAAACAAATGTTGCAATGAAATATTGCAAGAGCATAAGCCTTTAGTAAACCTTATCCAACACAGGTTCCGGCTGGTGGCCAGCAAAATGTTA   | <b>1090</b> |
| <b>TaMED25-D:</b> | TCGATTATTTTCAAGAAACAAATGTTGCAATGAAATATTGCAAGAGCATAAGCCTTTAGTAAACCTTATCCAACACAGGTTCCGGCTGGTGGCCAGCAAAATGTTA   | <b>1090</b> |
|                   |                                                                                                              |             |
| <b>TaMED25-A:</b> | GCATCTTAAACAATCTCTCACAACATCGACACTCTTTAACAGCAGCTACTCAATGGGACCTAACATGGGGCAACACCTATACAAGTGCACATGTCAAACATGATATC  | <b>1199</b> |
| <b>TaMED25-B:</b> | GCATCTTAAACAATCTCTCACAACATCGACACTCTTTAACAGCAGCTACTCAATGGGACCTAACATGGGGCAACACCTATACAAGTGCACATGTCAAACATGATATC  | <b>1199</b> |
| <b>TaMED25-D:</b> | GCATCTTAAACAATCTCTCACAACATCGACACTCTTTAACAGCAGCTACTCAATGGGACCTAACATGGGGCAACACCTATACAAGTGCACATGTCAAACATGATATC  | <b>1199</b> |
|                   |                                                                                                              |             |
| <b>TaMED25-A:</b> | GAGTGGCATGACATCACTCTCGCTGTCTATCTTCTATATCTGGAACAGTACAGCCAAATGGTGTCTAACAGTTGGACAGAAACAGCTCTCGGTTCTTTGGGTCA     | <b>1308</b> |
| <b>TaMED25-B:</b> | GAGTGGCATGACATCACTCTCGCTGTCTATCTTCTATATCTGGAACAGTACAGCCAAATGGTGTCTAACAGTTGGACAGAAACAGCTCTCGGTTCTTTGGGTCA     | <b>1308</b> |
| <b>TaMED25-D:</b> | GAGTGGCATGACATCACTCTCGCTGTCTATCTTCTATATCTGGAACAGTACAGCCAAATGGTGTCTAACAGTTGGACAGAAACAGCTCTCGGTTCTTTGGGTCA     | <b>1308</b> |
|                   |                                                                                                              |             |
| <b>TaMED25-A:</b> | AACACTTCTACTGTATCTGTAAATCAAATATGGCGTATCTCTCTTTTGCTAACATACAAGCAACATGGCCATGGGACAATCAGTGCCTTCTATGGCACAAGGTG     | <b>1417</b> |
| <b>TaMED25-B:</b> | AACACTTCTACTGTATCTGTAAATCAAATATGGCGTATCTCTCTTTTGCTAACATACAAGCAACATGGCCATGGGACAATCAGTGCCTTCTATGGCACAAGGTG     | <b>1417</b> |
| <b>TaMED25-D:</b> | AACACTTCTACTGTATCTGTAAATCAAATATGGCGTATCTCTCTTTTGCTAACATACAAGCAACATGGCCATGGGACAATCAGTGCCTTCTATGGCACAAGGTG     | <b>1417</b> |
|                   |                                                                                                              |             |
| <b>TaMED25-A:</b> | GTCTGATGGTGGTCCACAATCAGGACAAGGTGGAAATGGTACGAACAAAACATGATAAATAACCTTGGGACTACAGCTATCTTTCTTACGCCTACATGATGCCAAC   | <b>1526</b> |
| <b>TaMED25-B:</b> | GTCTGATGGTGGTCCACAATCAGGACAAGGTGGAAATGGTACGAACAAAACATGATAAATAACCTTGGGACTACAGCTATCTTTCTTACGCCTACATGATGCCAAC   | <b>1526</b> |
| <b>TaMED25-D:</b> | GTCTGATGGTGGTCCACAATCAGGACAAGGTGGAAATGGTACGAACAAAACATGATAAATAACCTTGGGACTACAGCTATCTTTCTTACGCCTACATGATGCCAAC   | <b>1526</b> |
|                   |                                                                                                              |             |
| <b>TaMED25-A:</b> | ACCAGGAATGGTCCAGCAACAGGAGTAAAGCTCTTAGCGCAACACAGTTCTGTCTATGAATATGCCTCTGGCACAACATCCTAATGGCCAGCAACCATCGAAGTAT   | <b>1635</b> |
| <b>TaMED25-B:</b> | ACCAGGAATGGTCCAGCAACAGGAGTAAAGCTCTTAGCGCAACACAGTTCTGTCTATGAATATGCCTCTGGCACAACATCCTAATGGCCAGCAACCATCGAAGTAT   | <b>1635</b> |
| <b>TaMED25-D:</b> | ACCAGGAATGGTCCAGCAACAGGAGTAAAGCTCTTAGCGCAACACAGTTCTGTCTATGAATATGCCTCTGGCACAACATCCTAATGGCCAGCAACCATCGAAGTAT   | <b>1635</b> |
|                   |                                                                                                              |             |
| <b>TaMED25-A:</b> | GTCAAAATTTGGGAGGAACTTTGTCTGGGCAAGGCAAGGACACCTGTATTTATTTGTAACCTTGAAGGTTATAGGAGTGGAAACAGCGCTGACACACTTGTCTCAG   | <b>1744</b> |
| <b>TaMED25-B:</b> | GTCAAAATTTGGGAGGAACTTTGTCTGGGCAAGGCAAGGACACCTGTATTTATTTGTAACCTTGAAGGTTATAGGAGTGGAAACAGCGCTGACACACTTGTCTCAG   | <b>1744</b> |
| <b>TaMED25-D:</b> | GTCAAAATTTGGGAGGAACTTTGTCTGGGCAAGGCAAGGACACCTGTATTTATTTGTAACCTTGAAGGTTATAGGAGTGGAAACAGCGCTGACACACTTGTCTCAG   | <b>1744</b> |
|                   |                                                                                                              |             |
| <b>TaMED25-A:</b> | ACTGGCCAGAAACGATGCAGATCGTGGCCTCATAGCCCAAGAGCATATGAACAACAAGCAGTATGTTGGCAAGGCGACTTTCTAGTATTTCCACATTGAATCAGCA   | <b>1853</b> |
| <b>TaMED25-B:</b> | ACTGGCCAGAAACGATGCAGATCGTGGCCTCATAGCCCAAGAGCATATGAACAACAAGCAGTATGTTGGCAAGGCGACTTTCTAGTATTTCCACATTGAATCAGCA   | <b>1853</b> |
| <b>TaMED25-D:</b> | ACTGGCCAGAAACGATGCAGATCGTGGCCTCATAGCCCAAGAGCATATGAACAACAAGCAGTATGTTGGCAAGGCGACTTTCTAGTATTTCCACATTGAATCAGCA   | <b>1853</b> |
|                   |                                                                                                              |             |
| <b>TaMED25-A:</b> | TGGTTTCCCTCGGACAACACAAAGAGAAGAAATGTGTGTCAGTATTCAGCTACCTTCAAACTTTGTGTTGTGTCAGTGTCTGACAAAGCTGGGCGCCTCATAGGAATG | <b>1962</b> |
| <b>TaMED25-B:</b> | TGGTTTCCCTCGGACAACACAAAGAGAAGAAATGTGTGTCAGTATTCAGCTACCTTCAAACTTTGTGTTGTGTCAGTGTCTGACAAAGCTGGGCGCCTCATAGGAATG | <b>1962</b> |
| <b>TaMED25-D:</b> | TGGTTTCCCTCGGACAACACAAAGAGAAGAAATGTGTGTCAGTATTCAGCTACCTTCAAACTTTGTGTTGTGTCAGTGTCTGACAAAGCTGGGCGCCTCATAGGAATG | <b>1962</b> |
|                   |                                                                                                              |             |
| <b>TaMED25-A:</b> | CTGTTCCAGGGGATATGGTGGTATTCAAACCACAGGTTCTCAACTCAGCAGCCACAGATGCAGCCACAGCAGCAGCAGCAGCAGCAGCTACACAGCAGCAGCAGC    | <b>2065</b> |
| <b>TaMED25-B:</b> | CTGTTCCAGGGGATATGGTGGTATTCAAACCACAGGTTCTCAACTCAGCAGCCACAGATGCAGCCACAGCAGCAGCAGCAGCAGCAGCTACACAGCAGCAGCAGC    | <b>2071</b> |
| <b>TaMED25-D:</b> | CTGTTCCAGGGGATATGGTGGTATTCAAACCACAGGTTCTCAACTCAGCAGCCACAGATGCAGCCACAGCAGCAGCAGCAGCAGCAGCTACACAGCAGCAGCAGC    | <b>2071</b> |
|                   |                                                                                                              |             |
| <b>TaMED25-A:</b> | AAATACAGCAGCAACAGCAGCAACTACAGCAACTGCAACAGCAGCAACTACACAGCACCATAAGCAATGCAAGCTCAAGGCCAGCACTTACGAGCAGCAGCAGAT    | <b>2174</b> |
| <b>TaMED25-B:</b> | AAATACAGCAGCAACAGCAGCAACTACAGCAACTGCAACAGCAGCAACTACACAGCACCATAAGCAATGCAAGCTCAAGGCCAGCACTTACGAGCAGCAGCAGAT    | <b>2180</b> |
| <b>TaMED25-D:</b> | AAATACAGCAGCAACAGCAGCAACTACAGCAACTGCAACAGCAGCAACTACACAGCACCATAAGCAATGCAAGCTCAAGGCCAGCACTTACGAGCAGCAGCAGAT    | <b>2180</b> |
|                   |                                                                                                              |             |
| <b>TaMED25-A:</b> | GCAGCAATGCAACAGCAACAAACAGATGCAGCAATGCAACAAACAAACAGCAGCAGCAGATTCACAGCAACACAGATGCAGCAGCAGCAGCAGCAGCAG          | <b>2277</b> |
| <b>TaMED25-B:</b> | GCAGCAATGCAACAGCAACAAACAGATGCAGCAATGCAACAAACAAACAGCAGCAGCAGATTCACAGCAACACAGATGCAGCAGCAGCAGCAGCAGCAGCAG       | <b>2289</b> |
| <b>TaMED25-D:</b> | GCAGCAATGCAACAGCAACAAACAGATGCAGCAATGCAACAAACAAACAGCAGCAGCAGATTCACAGCAACACAGATGCAGCAGCAGCAGCAGCAGCAGCAG       | <b>2283</b> |
|                   |                                                                                                              |             |
| <b>TaMED25-A:</b> | CAGCAACAGCAACACAGATGCAGCAATGCAACAAACAAACAGCAGCAGCAGCAGCAGCAGCAGCAGCAGCAGCAGCAGCAGCAGCAGCAGCAGCAGCAGCAGC      | <b>2383</b> |
| <b>TaMED25-B:</b> | CAGCAACAGCAACACAGATGCAGCAATGCAACAAACAAACAGCAGCAGCAGCAGCAGCAGCAGCAGCAGCAGCAGCAGCAGCAGCAGCAGCAGCAGCAGCAGC      | <b>2389</b> |
| <b>TaMED25-D:</b> | CAGCAACAGCAACACAGATGCAGCAATGCAACAAACAAACAGCAGCAGCAGCAGCAGCAGCAGCAGCAGCAGCAGCAGCAGCAGCAGCAGCAGCAGCAGCAGC      | <b>2392</b> |
|                   |                                                                                                              |             |
| <b>TaMED25-A:</b> | AACAATTCATGAGGGGATGGTGGGGCGGTGCAGATGATGCAAGGAAAGATCGCGCCACAGGGCCAGGCAACATGTCTGGAGGAGGCTACCTATCTTGA           | <b>2484</b> |
| <b>TaMED25-B:</b> | AACAATTCATGAGGGGATGGTGGGGCGGTGCAGATGATGCAAGGAAAGATCGCGCCACAGGGCCAGGCAACATGTCTGGAGGAGGCTACCTATCTTGA           | <b>2490</b> |
| <b>TaMED25-D:</b> | AACAATTCATGAGGGGATGGTGGGGCGGTGCAGATGATGCAAGGAAAGATCGCGCCACAGGGCCAGGCAACATGTCTGGAGGAGGCTACCTATCTTGA           | <b>2493</b> |

**Figure S2.** Allelic variation at the *TaMED25-A*, *TaMED25-B* and *TaMED25-D* coding regions. *TaMED25-A*, *TaMED25-B* or *TaMED25-D* represents *TaMED25* CDS nucleotide sequences derived from wheat A, B or D genome; nucleotide variations among *TaMED25-A*, *TaMED25-B* and *TaMED25-D* are shaded in dark or gray.







## Figure S4

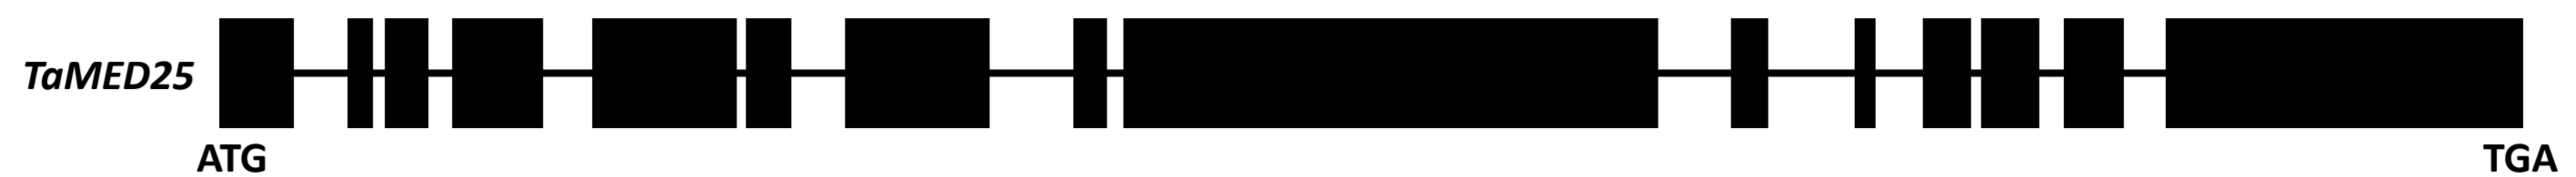

**Figure S4.** Schematic diagram of *TaMED25* gene structure. Black boxes indicate exons, and black lines in the middle represent introns.

## Figure S5

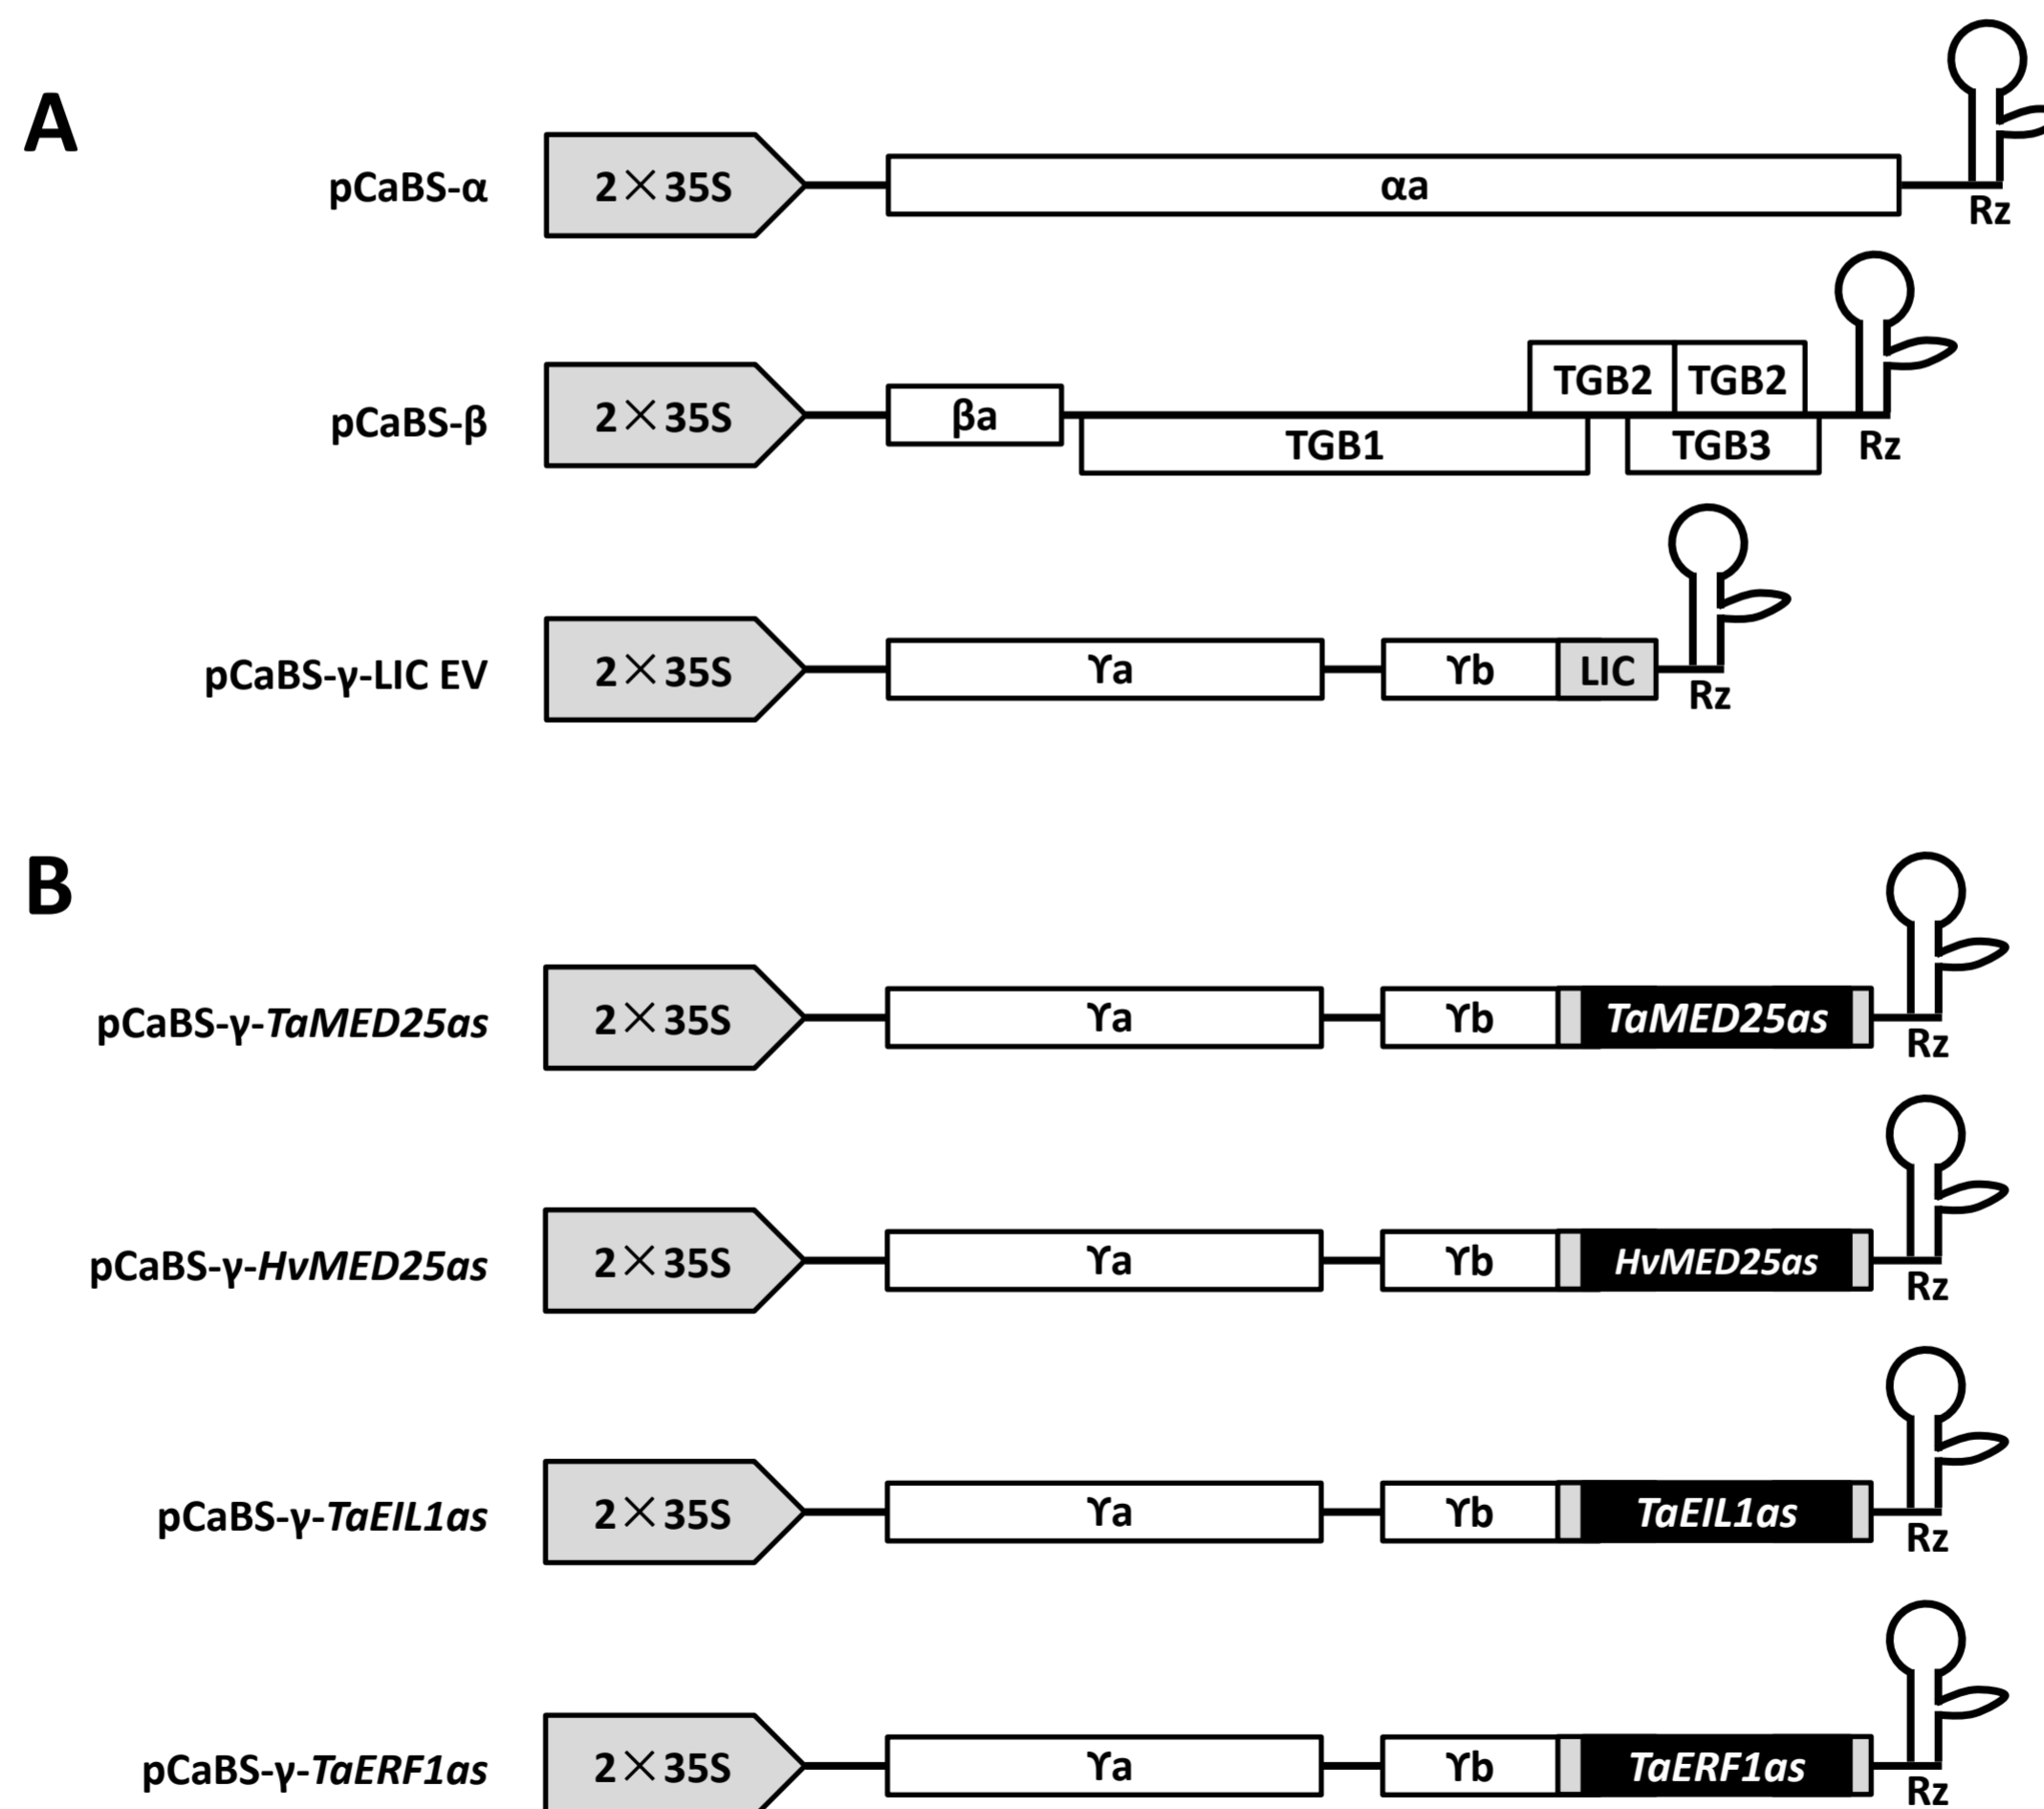

**Figure S5.** Constructions of BSMV-VIGS vectors. (A) Schematic representations of pCaBS-α, pCaBS-β and pCaBS-γ. (B) Construction of pCaBS-γ vectors for silencing of *TaMED25*, *HvMED25*, *TaEIL1* and *TaERF1*. The antisense fragments (about 300 bp in length) of *TaMED25*, *HvMED25*, *TaEIL1* and *TaERF1* (Shown in Supplemental Fig. S6 and Fig. S7) were PCR amplified and ligated into the LIC region of pCaBS-γ vector by using ligation independent cloning (LIC) strategy.





## Figure S7

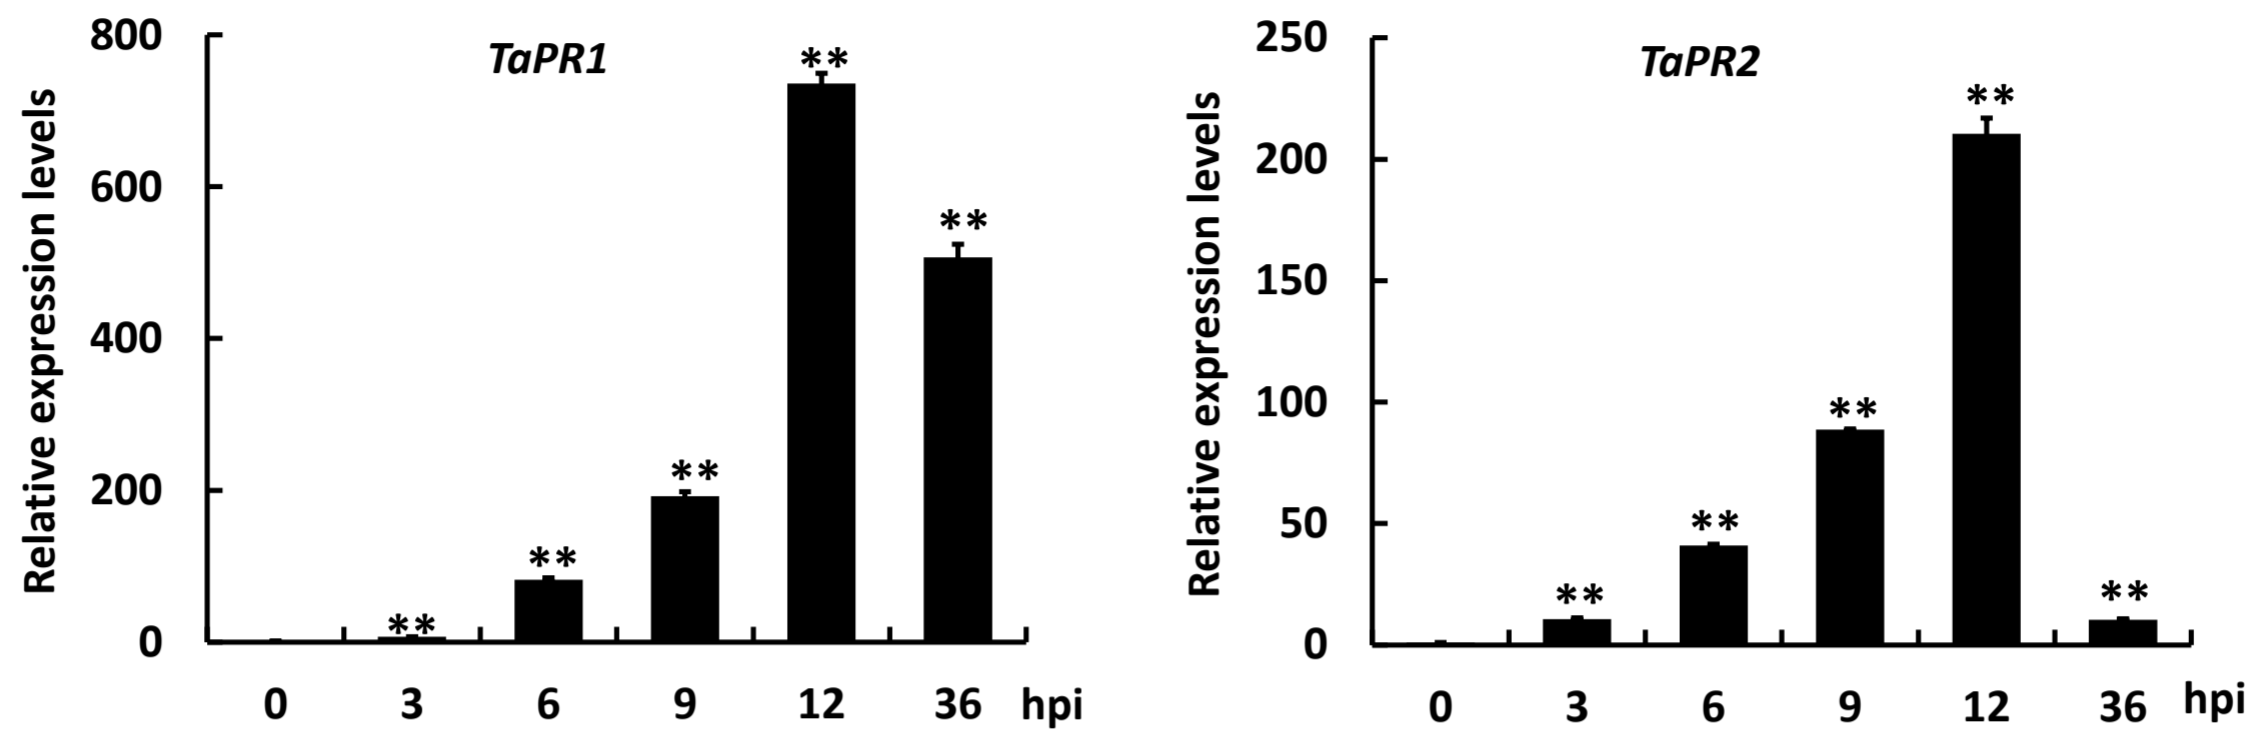

**Figure S7.** *TaPR* genes are induced by *Bgt* infection. The relative transcript levels of *TaPR1* and *TaPR2* in the *Bgt*-infected bread wheat leaves were determined by using qRT-PCR analyses. The amplification of the *TaGAPDH* gene was used as an internal control to normalize all the data. Error bars indicate SD among three independent replicates, and “\*\*” above the bars represent significant differences of expression levels between control and each treatment at  $p < 0.01$  (Student’s *t* test). All the experiments were performed three times with similar results.

## Figure S8

### *HvMED25* CDS:

```

ATGGTGGAGGGGATGGCTTCGGAGAGGCAGCTGGTGGTGGTCGTCGAGGGCACGGCGGGCTGGGGCCGTAAGTGGACCGCCATTGCGACCGAGTACGTCGAGAAGATCGTTCGGAGTTTTTGTTCAACTG
AACTATCAGGGCAGAAGCTTGCAGGGGTACCACCTGAGCTTGCATTAGTTGTCTTCCATACCCATGGACCTTACAGTGCCTTTGTTGTACAACGCAGCGGTTGGACAAAAGATATGGATGCTTTTCTTTTCATG
GTTATCAGGAATATCATTAGTGGTGGAGGCTTCAGTGGAGCTGCTATTTGTGAAGGCTTGTCTGAAGCACTGATGATACTCCAAGGCAGTCTAGCAACAGCCAGAATCATCAAATCGTGAACCTCAAAA
GCATTGCCTACTTGTGCTGCAAGTAATCCTTACCCGCTGCCTACACCTGTCTATCGCCCTTCTGTTCAAAGTAGTGATCACAAAAGAGCAATGAAGCAACAAAGGAATCATGTCTTGCTGATGCTGAGGCT
GTTGCAGTCTCATTGCTCAGTGTCTGTATCGTTGTCGGTGGTATCTCCTAAACAGCTACCAACACTGAAGGCAATATAACAATGCGGGAAAGAGGAATCCTCAAGCTTCTGATCCATCAGTTGATCATGCCA
AAACCCACATTTTCTGTTTTGCTGTCTGAGAGTTTCATGGAGGCTCGAACCGCCCTAAGCCATCCTTTACCTGGGAACCTTGTCCCAAACCCACACCATTACAAAATGGATACCGCACCTGCAACTACTGT
GCCAGGACCACCTTCGAATGCCAGTCCCTCAGTGAATGGAACGATGATGGGACGTCAACCGACTGCAAATGTTAAAGTGGAGCCGACAACCTATAACCAATGGTTTTCTCAACCTGCATTCTCTCATATGAC
ACCTATTTCAAATGTTGCTTCTCAAGGAATATCAGCAATGAAAACCTTCTTACCATTGATTATTTACAAGAAAACAATGTTGCAAATGAAATATTGCAAGAGCATAAACCTTTAGTAAACCTATCCAACAAC
AGGTTCCGGCCTGGTGGCCAGCAAATGGTAGCATCCTAAACAATCTGTCCAAACATCGACACTCTTTAACAGCAGCTACCTCAATGGGACCTAACATGGGAGCAACACCTATACAAGTGACATGTCA
AACATGTTATCAAGTGGCATGACATCAACCCCGCTGTATATCTTCTATATCTGGAACAGTACAGCCAATTGGTGTCTCAACAGTTGGTACAGAACACAGCTCTCGGTTCTTTTGGGTCAAACAC
TTCTACTGTATCTGGTAATTCAAATATTGCCGTATCGTCTTCTTTGGCTAACATACAAAGCAACATGGCCATGGGACAATCAGTGCCTTCTATGGCACAAGGTGGTTTGATGGCTGGTTCACAATC
AGGACAAGGTGGAATTGGTACGAACCAGAACATGATAAATAACCTTGGCACTACAGCTATCTTCTTACGCTACAATGATGCAACCGCAGGAATGGTCCAACAACAGGAGTAAATGCTCTTAGTGTGAA
CAACAGTTCTGCTATGAATATGCCTATGCCTAACATCCTAATGGCCAGCAACCATCGAAGTATGTCAAATTTGGGAGGGAACCTTGTCTGGGCAAAGGCAAGGACAACCTGTATTTATTTGTAACCTGAA
GGTTATAGGAGTGGAACAGCATCTGACGCGCTTGTCTCAGACTGGCCAGAAAACAATGCAGATCGTGCGCCTCATAGCCAAAGAGCATATGAATAACAAGCAGTATGTTGGTAAGGCAGACTTTCTAGTATTT
CGGACATTGAATCAGCATGGGTTCTCGGACAACCTACAAGAGAAGAACTGTGTGCAGTGATTACAGCTACCTTACAAAACCTTTGCTGTTGTGAGTGTCTGACAAAAGCTGGGCGCCTCATAGGAATGCTGTTT
CCAGGGGATATGGTGGTATTCAAACCACAGGTCTCGACTCAGCAGCCACAGATGCAGCCACAGCAGCAGCAGCAGCTGCAACAGCAGCAGCACCAAATACAGCAGCAACAGCAGCAACTACAGCAACTG
CAACAGCAGCAACTACAGCAGCACCAAATGCAAATGCAGCCTCAAGGCCAGCAACTTTCAGCAGCAGCAGCAGATGCAGCAAATGCAACAGCAACAACAACAGATGCAGCAAATGCAACACCAACAACA
GCAGCAGCAGATTCAACAGCAGCAGCAGATGCAGCAGCAGCAGCAACAACAACAGCAACAGATGCAGCAGATGCAGCAGCAGCAGCAGCAACAGCCTCAACAACCTCCAGCAGCAGCCCCAGATGGTGG
GTACAGGGATGGGTGAGCAACAATTCATGAGGGGCATGGTTCGGGCGGTGAGATGATGCAAGGAAAGATCGCGCCACAGGGCCAGGCAACATGTCTGGGGGAGGCTACCTATCTTGA

```

**Figure S8.** The coding sequence of *HvMED25*. The full length CDS of *HvMED25* is shown above, and the red color represents the selected sequence for the generation of BSMV silencing construct, as shown in Supplemental Fig. S5B.

**Figure S9**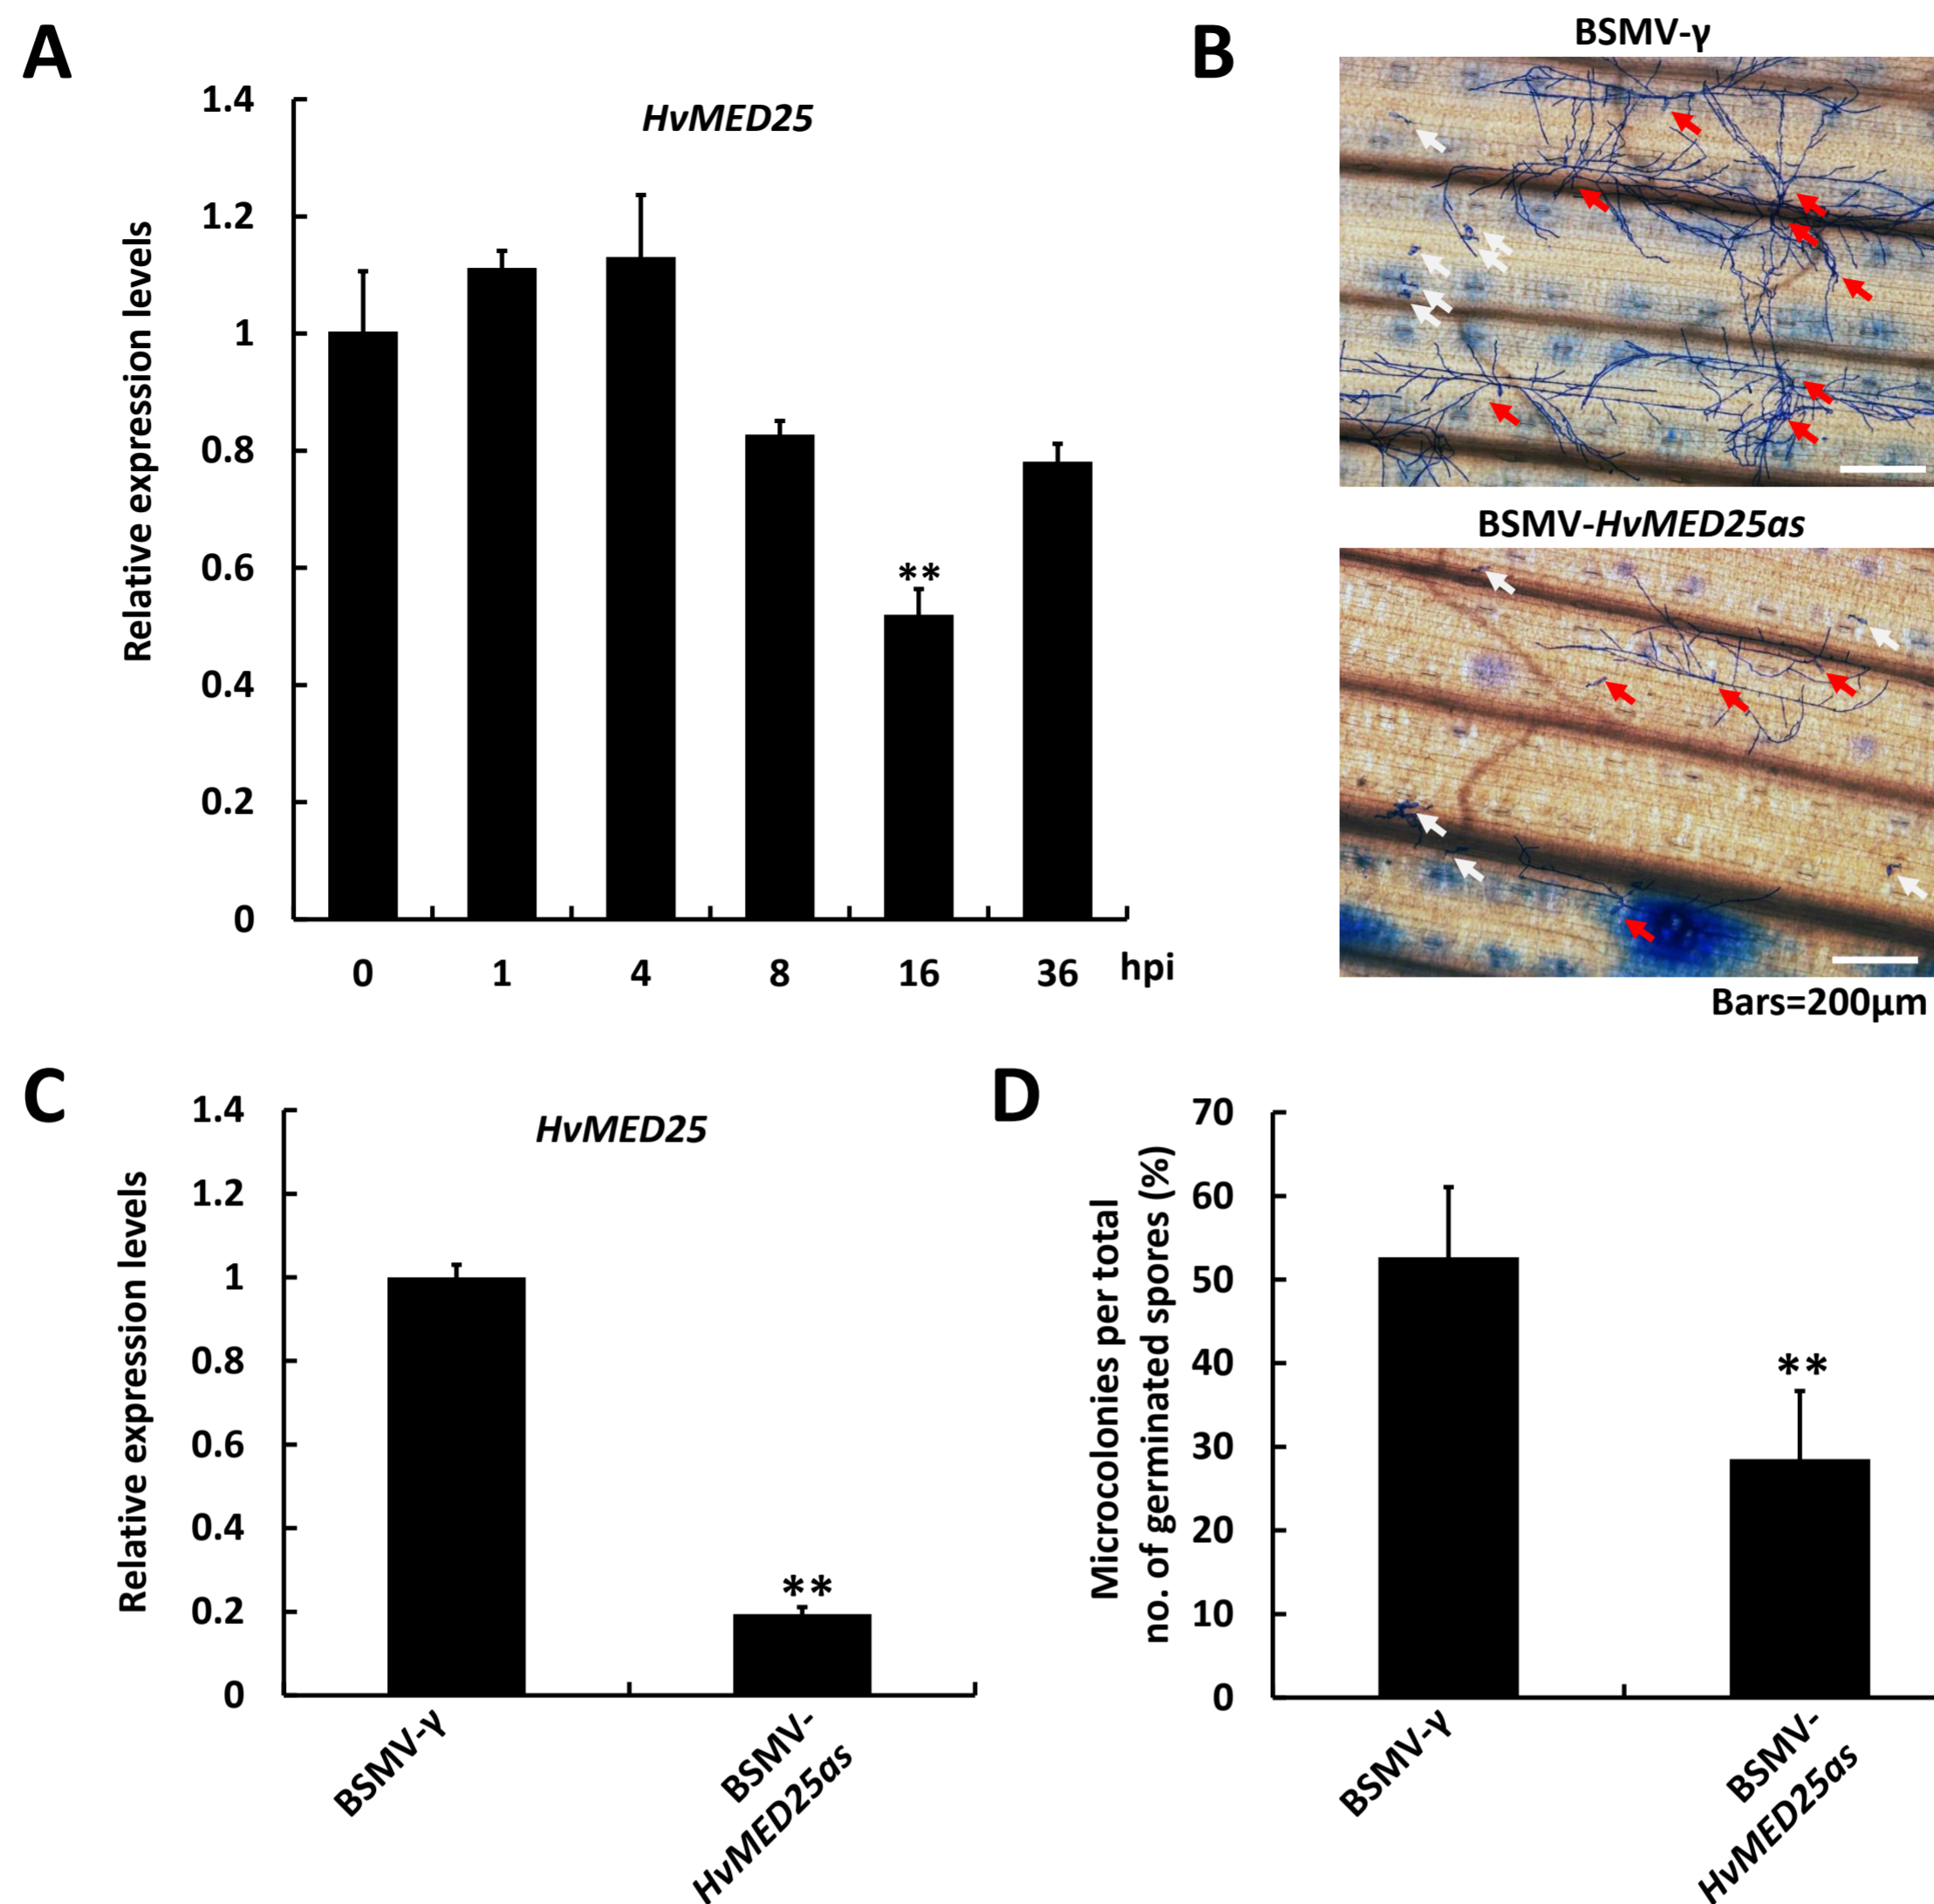

**Figure S9.** Knockdown of barley *MED25* reduces barley susceptibility to *Blumeria graminis* f. sp. *hordei* (*Bgh*) fungus. **(A)** qRT-PCR analysis of *HvMED25* relative expression levels in *Bgh*-infected barley leaves. Leaf samples of *Bgh* K1-infected barley cultivar ‘Golden Promise’ were collected at 0, 1, 4, 8, 16 and 36 hpi, and the expression level of *HvMED25* was normalized to the internal control gene *HvActin1*. **(B)** *B. graminis* microcolony formation on BSMV- $\gamma$ - or BSMV-*HvMED25as*-infected barley leaves. Barley (*Hordeum vulgare*) cultivar ‘Golden Promise’ was infected with BSMV-*HvMED25as* that harboring antisense fragment of *HvMED25*, or BSMV- $\gamma$  empty vector constructs. After typical BSMV symptoms appeared, the leaves were challenged with the spores of *Bgh* isolate K1 at a low density. Leaf samples were collected at 72 hpi for staining, and the microcolonies were microscopically observed and analyzed. Red arrows indicate successfully colonized spores, and white arrows represent spores germinated but failed to form colony. Bars = 200  $\mu$ m. **(C)** Relative transcript levels of *HvMED25* in BSMV-mediated *HvMED25* silencing barley leaves. The expression levels of *HvMED25* in BSMV- $\gamma$  and BSMV-*HvMED25as* BSMV-VIGS barley leaves were determined by qRT-PCR, and its expression levels were normalized against *HvActin1*. **(D)** Statistical analysis of *B. graminis* microcolony formation index on barley BSMV- $\gamma$  or BSMV-*HvMED25as* lines. For each treatment, 10-15 leaves (4-5cm in length) were independently collected (the third and fourth leaves from 10-15 BSMV-infected barley plants). The successfully colonized *B. graminis* and the spores without forming colony were then separately counted. The *B. graminis* microcolony formation index represents the percentage of successfully colonized *B. graminis* out of all analyzed spores. The experiments above were independently replicated for three times to calculate the mean and standard deviation. “\*\*” above the bars represent groups with significant differences at  $p < 0.01$  (Student’s *t* test).



## Figure S10

*TaERF1<sub>pro</sub>*:

```

GTGTTCTGACTGGCACCCCATCTGGTCAGAATGGATTATTCGGTCAAATTAGAAATTTGTCATGAGTGACGTCACATTGGAATAGAATGTGACAAGTCAAGATGGAGTAGAAGGTTGCCATGTCTGAAATGG
ATAAGGAAAAGTTTCGAGGTCCCTCCTAATTAATTAAGGCATTTGGGCAATACCAAATAGAAGCCAGACGTAAGTGTCTAGCTATATGTCAAATGCTAGAGTGCAATTTTCTTGAGTAAATAGCTACTTCCTCTT
GTCCATAATATAAGATGTTTTTTTTGAAATGATATAAGATGTTTTTTAATACTACACTAGTGTCACAAAACGCTTACATTATGCGGGCCGAGGGATTAGCTAGCTAGCCAGCCAGGGGTATGTGGCTTGTGG
TCGTAACATGTGCACACAAGTAGCTAGAACAAGCAGCTAGTCACCAGCCTCTCGAAGTCGCTGTCTGCTGCTAATTGCGGGTCCGATAGGCACAACCTGAATGTGTAGCAAAGCTGTATCCAAATTTCCGTTGT
TTTTTCAAAGACAATCAGAATTTATTATAAAAAGTTCAACCGTAAGTTCAAAGAACCATAGACGTAATAAAAAATTATATCGAGGTCTCTAGGCTACTACATAATAAAAAATTATATCGAGGTTTCTAAGCTACTACG
TAATAAAAATTATATCAAGGTCTCTAGGCTGCTACCATTGCCAAAAAAAACCTTGAGTCATAGTTGAACCATTGAAACGACCTAAAGCATCTATCATCATATCTCGCCATATCATGCACCACAAGAGGT
CCTAACCCCGTCCGTCCTCAAGGACGGCAGAAATGTACATCGGAGCTCCGTTGACTCAGTCTGTCCGGACATACTCATGGAATCGAAACTTGAAAGACCAACTCGAAGAAGAGACACCATCAT
CCATCCAAACACCGCTCTGTGAGAAGTAACAACGAAGCCGAGGCAGTAGGATCTCATCGGTCATCGGTGGAGCCTTGAGGGAAGAATTTGACCCAAACCACAGCTTACGAGGAATGGAAGAA
AATTGACCTATGAAATTTGCACGGATGATAAGCTTCCCGCAAAAAAAAAAATGCTACGCGTGCTGGCGCCATTCCGGTCTTGAGACTTTGCCTACAACCTGACCAAGGAAAAAGAGTATATCTAGA
GTTCTATAGACTACGACGCTCCTGGCTAAGCACAAAGTTACCATTCTTTCCACCTTTCTGTCTGGAAGCGGACCCAAACGAACGCATGGACGACAATTAATCGCAGATACAATGTATCACATGTTTTT
GTGCCAGTGGAGGGTTACATTTCTTAATCTAATCCAATTGTCCATGGAAGACTCGATCAGGGTGAGTGAGTGACACACACCTAGCTACTTAACAAACACGTGGTGGTCGCCGACGGCTCCACTTGACACT
ATGTCCACTTGATCATAACCAAATAAGCTACCCAGATGCAATTATTCTTATTATTATTTTTGCAGGTGCAATTAATTTTATTGGTACTACTATGAATTTCCCATGATCGATCAAATATCCTAATATGCTCTTT
TGCTCCCGATCTCCCATGATCTACCATGAATTCAAATCTTTGTGAATTATTTGCTATATTTGTTATAGTTTAGTCTTCATATGGGTGCAGATAAGCTTGGGAGCCAAACTCCAGGCCGTGACGA
ATTCTTGTGCCTTTACAGTCACCACTAGTGCCCGCAAATTTCTAATTTTTGGATCTAAATTTTATAATCCATATCTTTTTATTATTTTTCTATATTTTGCTTGAATTGGCATCTCGGTTTCT
AGGACTATCTCAACCTACAATTAGTACTCATGTCAAACGAATGTGCCCCAGCAACAGCACGTTGCCAAGCAGAGCATTTCAGTAATTCCAAATCTACCCTCCGCTGCATCATTCTCACCTCTGCTC
AACCAACTCCCGCCACCGGTATAAATCCCATGGAGCCGCGCTCCATCCGTTCCAGCTTCCAACCGACATCCCACGAGAAAAACTCC

```

**Figure S10.** Promoter sequence of *TaERF1* used for yeast one-hybrid analysis and transactivation assay. P1 and P2 regions of *TaERF1<sub>pro</sub>* are marked in red and blue, respectively.

## Figure S11

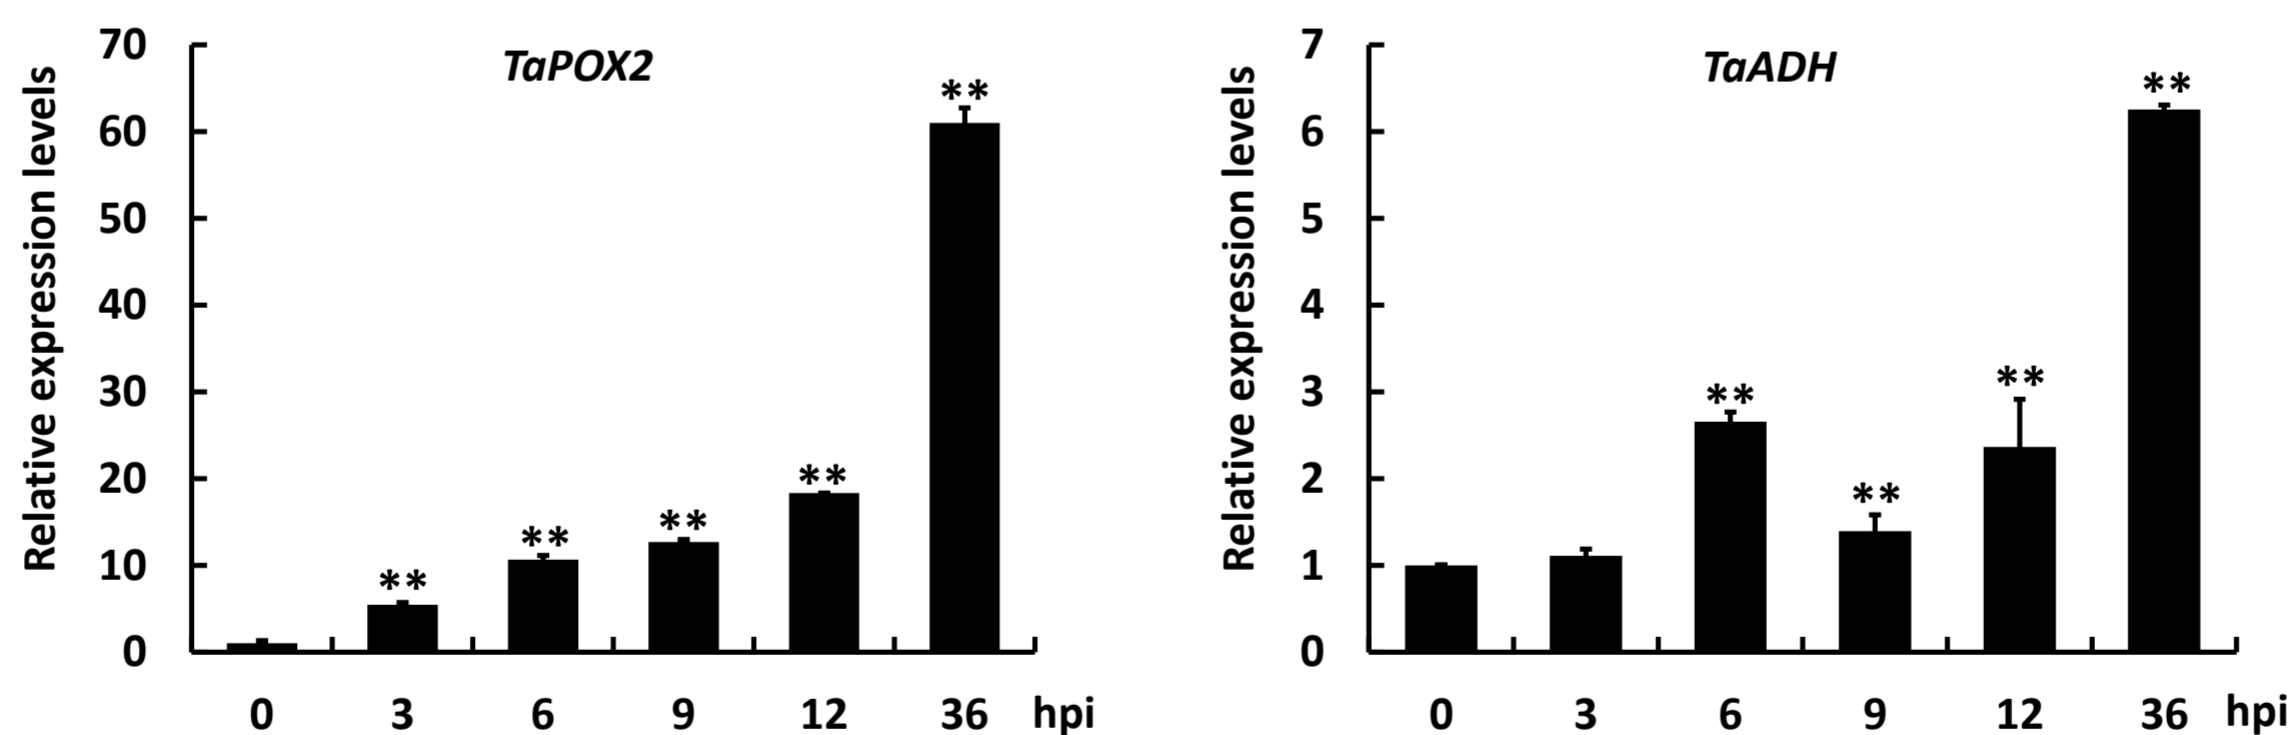

**Figure S11.** *TaERF1* targeting genes *TaPOX2* and *TaADH* are induced by *Bgt* infection. Bread wheat first leaves were collected at different time points after the inoculation of *Bgt*, and the relative transcript levels of *TaPOX2* and *TaADH* were quantified by qRT-PCR. The amplification of the *TaGAPDH* gene was used as an internal control to normalize all the data. Error bars indicate SD, and “\*\*” above the bars represent significant differences of expression levels between control and each treatment at  $p < 0.01$  (Student’s *t* test).

**Table S1.** Statistical analysis of *B. graminis* microcolony formation index on the BSMV-VIGS bread wheat lines. The successfully colonized *B. graminis* and the spores without forming colony were separately counted, and the *B. graminis* microcolony formation index represents the percentage of successfully colonized *B. graminis* out of all analyzed spores. Numbers before and after “±” separately represent the means and SD of each replication. Three independent replications were conducted, and the significant difference level of microcolony formation indexes between BSMV-γ control and each treatment was analyzed by Student’s *t* test. “\*\*\*” in the table represent significant differences at  $p<0.01$  level. “-”, not analyzed.

| Sample name            | <i>B. graminis</i> microcolony formation index (%) |               |               | Significant difference level compared with BSMV-γ |
|------------------------|----------------------------------------------------|---------------|---------------|---------------------------------------------------|
|                        | Replication 1                                      | Replication 2 | Replication 3 |                                                   |
| BSMV-γ                 | 35.45 ± 13.83                                      | 35.73 ± 15.35 | 41.08 ± 21.72 | -                                                 |
| BSMV- <i>TaMED25as</i> | 5.87 ± 4.20                                        | 8.55 ± 0.50   | 13.68 ± 4.68  | **                                                |
| BSMV- <i>TaEIL1as</i>  | 21.68 ± 17.58                                      | 17.01 ± 5.81  | 21.14 ± 3.65  | **                                                |
| BSMV- <i>TaERF1as</i>  | 15.98 ± 4.63                                       | 14.33 ± 2.36  | 18.50 ± 2.36  | **                                                |

**Table S2.** Statistical analysis of *B. graminis* microcolony formation index on the BSMV-VIGS barley lines. The barley cultivar ‘Golden Promise’ was used for the analysis, and was infected by the *Bgh* isolate K1. The successfully colonized *B. graminis* together with the spores without forming colony were separately counted, and the *B. graminis* microcolony formation index represents the percentage of successfully colonized *B. graminis* out of all analyzed spores. Numbers before and after “±” represent the means and SD of each replication, respectively. Three independent replications were conducted, and the significant difference level of microcolony formation indexes between BSMV-γ control and each treatment was analyzed by Student’s *t* test. “\*\*\*” in the table mean the significant differences at  $p<0.01$  level. “-”, not analyzed.

| Sample name            | <i>B. graminis</i> microcolony formation index (%) |               |               | Significant difference level compared with BSMV-γ |
|------------------------|----------------------------------------------------|---------------|---------------|---------------------------------------------------|
|                        | Replication 1                                      | Replication 2 | Replication 3 |                                                   |
| BSMV-γ                 | 56.20 ± 7.06                                       | 51.12 ± 10.88 | 50.32 ± 7.38  | -                                                 |
| BSMV- <i>HvMED25as</i> | 26.35 ± 12.19                                      | 29.55 ± 4.78  | 30.01 ± 6.70  | **                                                |



**Table S3.** BiFC assay showing the interaction of TaMED25 and TaEIL1 in bread wheat protoplasts. The indicated combinations of constructs were cotransfected into bread wheat protoplasts, and YFP signal was observed by fluorescence microscope 24 h after transformation. In each replicate, more than 40 protoplast cells were analyzed, and the numbers of cells with or without YFP signal were statistically counted. Three replicates were independently performed.

| Replication | Item                        | nYFP<br>cYFP | TaMED25-nYFP<br>cYFP | nYFP<br>TaEIL1-cYFP | TaMED25-nYFP<br>TaEIL1-cYFP |
|-------------|-----------------------------|--------------|----------------------|---------------------|-----------------------------|
| 1           | Cell number with YFP signal | 0            | 0                    | 0                   | 50                          |
|             | Cells without YFP signal    | 52           | 42                   | 44                  | 7                           |
|             | Total cell number           | 52           | 42                   | 44                  | 57                          |
| 2           | Cell number with YFP signal | 0            | 0                    | 0                   | 49                          |
|             | Cells without YFP signal    | 43           | 40                   | 40                  | 2                           |
|             | Total cell number           | 43           | 40                   | 40                  | 51                          |
| 3           | Cell number with YFP signal | 0            | 0                    | 0                   | 40                          |
|             | Cells without YFP signal    | 40           | 40                   | 40                  | 6                           |
|             | Total cell number           | 40           | 40                   | 40                  | 46                          |

**Table S4.** CFP fluorescence decay frequency within ROI in FLIM-FRET experiment to detect the interaction of TaEIL1 and TaMED25. Six independent cell nuclei were quantified by confocal microscope in each treatment. ROI: Region of interest. “\*\*\*” in the table represents the significant differences at  $p < 0.01$  by Student’s  $t$  test.

| Sample name             | Average fluorescence lifetime $\tau$ [ns] |            |            |            |            |            | Mean                |
|-------------------------|-------------------------------------------|------------|------------|------------|------------|------------|---------------------|
|                         | Cell 1 ROI                                | Cell 2 ROI | Cell 3 ROI | Cell 4 ROI | Cell 5 ROI | Cell 6 ROI |                     |
| TaEIL1-CFP/mYFP         | 3.15                                      | 3.06       | 2.96       | 3.09       | 2.98       | 2.94       | 3.03 $\pm$ 0.08     |
| TaEIL1-CFP/TaMED25-mYFP | 1.93                                      | 1.98       | 1.79       | 1.83       | 1.58       | 1.82       | 1.82 $\pm$ 0.14 *** |

**Table S5.** Statistical analysis of H<sub>2</sub>O<sub>2</sub> accumulation index in *Bgt*-infected bread wheat epidermal cells. Two types of *Bgt*-infected bread wheat epidermal cells with differentially accumulated H<sub>2</sub>O<sub>2</sub> (type I: cells without H<sub>2</sub>O<sub>2</sub> production, type II: cells with highly accumulated H<sub>2</sub>O<sub>2</sub>, as shown in Fig. 9B and 9C) in BSMV-VIGS bread wheat leaves were microscopically counted, and H<sub>2</sub>O<sub>2</sub> accumulation index represents the percentage of type II cells out of all *Bgt*-infected epidermal cells. In each treatment, at least 10 independent bread wheat leaves (3-4cm in length) were DAB-stained, and all the germinated *Bgt* spores on these leaves were microscopically analyzed. Three independent replications were conducted, and the significant difference level of microcolony formation indexes between BSMV- $\gamma$  control and each treatment was analyzed by Student’s  $t$  test. Numbers before and after “ $\pm$ ” represent the means and SD of each replication, respectively. “\*\*\*” and “\*” in the table represent the significant differences at  $p < 0.01$  and  $p < 0.05$  levels, respectively. “-”, not analyzed.

| Sample name    | H <sub>2</sub> O <sub>2</sub> accumulation index (%) |                  |                  | Significant difference level<br>compared with BSMV- $\gamma$ |
|----------------|------------------------------------------------------|------------------|------------------|--------------------------------------------------------------|
|                | Replication 1                                        | Replication 2    | Replication 3    |                                                              |
| BSMV- $\gamma$ | 3.54 $\pm$ 1.99                                      | 6.17 $\pm$ 0.68  | 8.49 $\pm$ 3.17  | -                                                            |
| BSMV-TaMED25as | 21.68 $\pm$ 3.03                                     | 18.74 $\pm$ 1.60 | 21.70 $\pm$ 3.10 | **                                                           |
| BSMV-TaEIL1as  | 16.05 $\pm$ 1.84                                     | 17.64 $\pm$ 1.94 | 16.44 $\pm$ 2.56 | *                                                            |
| BSMV-TaERF1as  | 16.07 $\pm$ 2.63                                     | 20.46 $\pm$ 2.56 | 19.96 $\pm$ 4.02 | *                                                            |

**Table S6.** DNA constructs in this study.

| Construct name              | vector               | Description                                    |
|-----------------------------|----------------------|------------------------------------------------|
| pCaBS- $\gamma$ -TaMED25as  | pCaBS- $\gamma$ -LIC | For BSMV mediated silencing of <i>TaMED25</i>  |
| pCaBS- $\gamma$ -HvMED25as  | pCaBS- $\gamma$ -LIC | For BSMV mediated silencing of <i>HvMED25</i>  |
| pCaBS- $\gamma$ -TaEIL1as   | pCaBS- $\gamma$ -LIC | For BSMV mediated silencing of <i>TaEIL1</i>   |
| pCaBS- $\gamma$ -TaERF1as   | pCaBS- $\gamma$ -LIC | For BSMV mediated silencing of <i>TaERF1</i>   |
| GAL4-AD-TaEIL1              | pDEST22              | For Y2H analysis                               |
| GAL4-BD-TaMED25             | pDEST32              | For Y2H analysis                               |
| GAL4-BD-TaEIL1              | pDEST32              | For transcriptional activity assay             |
| GAL4-BD-TaEIL1-NT           | pDEST32              | For transcriptional activity assay             |
| GAL4-BD-TaEIL1-MD           | pDEST32              | For transcriptional activity assay             |
| GAL4-BD-TaEIL1-CT           | pDEST32              | For transcriptional activity assay             |
| pHIS2-TaPIEpro-P1           | pHIS2(-Leu)          | For Y1H analysis                               |
| pHIS2-TaPIEpro-P2           | pHIS2(-Leu)          | For Y1H analysis                               |
| TaMED25-nLUC                | p1300-35S-nLUC       | For LCI assay                                  |
| TaMED25-vWF-A-nLUC          | p1300-35S-nLUC       | For LCI assay                                  |
| TaMED25-MD/ACID-nLUC        | p1300-35S-nLUC       | For LCI assay                                  |
| TaMED25-MD-nLUC             | p1300-35S-nLUC       | For LCI assay                                  |
| TaMED25-ACID-nLUC           | p1300-35S-nLUC       | For LCI assay                                  |
| TaMED25-Q-rich-nLUC         | p1300-35S-nLUC       | For LCI assay                                  |
| TaMED25- $\Delta$ ACID-nLUC | p1300-35S-nLUC       | For LCI assay                                  |
| cLUC-TaEIL1                 | p1300-35S-cLUC       | For LCI assay                                  |
| cLUC-TaEIL1-NT              | p1300-35S-cLUC       | For LCI assay                                  |
| cLUC-TaEIL1-MD              | p1300-35S-cLUC       | For LCI assay                                  |
| cLUC-TaEIL1-CT              | p1300-35S-cLUC       | For LCI assay                                  |
| HBT-TaEIL1-GFP              | HBT                  | For subcellular localization analysis in wheat |
| HBT-TaMED25-RFP             | HBT                  | For subcellular localization analysis in wheat |
| HBT-TaMED25-nYFP            | HBT                  | For BiFC assay in wheat                        |
| HBT-TaEIL1-cYFP             | HBT                  | For BiFC assay in wheat                        |
| HBT-TaEIL1-CFP              | HBT                  | For FLIM-FRET assay in wheat                   |
| HBT-TaMED25-mYFP            | HBT                  | For FLIM-FRET assay in wheat                   |
| p35S:TaEIL1-Myc             | pGWB17               | For LUC activity assay                         |
| p35S:TaMED25-Myc            | pGWB17               | For LUC activity assay                         |
| TaERF1pro:LUC               | pGWB35               | For LUC activity assay                         |



**Table S7.** Primers used in this study.

| Primer name          | Sequence                                                   | Annotation                                                                              |
|----------------------|------------------------------------------------------------|-----------------------------------------------------------------------------------------|
| TaMED25-F1           | 5'GGGGGTTGTGGGTGGTGG3'                                     | First round nested PCR for TaMED25 CDS cloning, forward (F) primer                      |
| TaMED25-R1           | 5'GCTCTGTACATAAGCACAAAACCAC3'                              | First round nested PCR for TaMED25 CDS cloning, reverse (R) primer                      |
| TaMED25-F            | 5'CCAAGGGGATTTCGTGGAGGTT3'                                 | Second round nested PCR for TaMED25 CDS cloning, F primer                               |
| TaMED25-R            | 5'GCCAAATCTCCAAGGAGCCTC3'                                  | Second round nested PCR for TaMED25 CDS cloning, R primer                               |
| BSMV-TaMED25-F       | 5'AACCACCACCACCGTGCTACCTCAATGGGACCTAA3'                    | Construction of pCaBS-TaMED25as for BSMV silencing of <i>TaMED25</i> , F primer         |
| BSMV-TaMED25-R       | 5'AAGGAAGTTTAATGGACCAGCCATCAGACC3'                         | Construction of pCaBS-TaMED25as for BSMV silencing of <i>TaMED25</i> , R primer         |
| BSMV-HvMED25-F       | Same with the primer 'BSMV-TaMED25-F'                      | Construction of pCaBS-HvMED25as for BSMV silencing of <i>HvMED25</i> , F primer         |
| BSMV-HvMED25-R       | 5'AAGGAAGTTTAATGAACCAGCCATCAAACC3'                         | Construction of pCaBS-HvMED25as for BSMV silencing of <i>HvMED25</i> , R primer         |
| BSMV-TaEIL1-F        | 5'AACCACCACCACCGTCGGATAAACTAGCAAGTGGGA3'                   | Construction of pCaBS-TaEIL1as for BSMV silencing of <i>TaEIL1</i> , F primer           |
| BSMV-TaEIL1-R        | 5'AAGGAAGTTTAAGGAAGTCTGCGGCATAAGG3'                        | Construction of pCaBS-TaEIL1as for BSMV silencing of <i>TaEIL1</i> , R primer           |
| BSMV-TaERF1-F        | 5'AACCACCACCACCGTTCGTCAACTTTCTGGCCCGTCGT3'                 | Construction of pCaBS-TaERF1as for BSMV silencing of <i>TaERF1</i> , F primer           |
| BSMV-TaERF1-R        | 5'AAGGAAGTTTAACTCTTGCTTCGCCGGCGCCGT3'                      | Construction of pCaBS-TaERF1as for BSMV silencing of <i>TaERF1</i> , R primer           |
| ENTRY-TaMED25-F      | 5'GGGGACAAGTTTGTACAAAAAAGCAGGCTTCATGGTGGAGGGGATGGCTTC 3'   | For pENTRY-TaMED25 construction, F primer                                               |
| ENTRY-TaMED25-R      | 5'GGGGACCACTTTGTACAAGAAAGCTGGGTTCAGATAGGTAGCCTCCTCCAGAC3'  | For pENTRY-TaMED25 construction, R primer                                               |
| ENTRY-EIL1-F         | 5'GGGGACAAGTTTGTACAAAAAAGCAGGCTTCATGATGGGAGGTGGGCTGCT3'    | For pENTRY-TaEIL1 and pENTRY-TaEIL1-NT constructions, F primer                          |
| ENTRY-EIL1-R         | 5'GGGGACCACTTTGTACAAGAAAGCTGGGTTCGTAGTACCAATTGGGGCCGTC3'   | For pENTRY-TaEIL1 and pENTRY-TaEIL1-CT constructions, R primer                          |
| ENTRY-EIL1NT-R       | 5'GGGGACCACTTTGTACAAGAAAGCTGGGTCCAAGCCGTCGCCAACGCCGC3'     | For pENTRY-TaEIL1-NT construction, R primer                                             |
| ENTRY-EIL1MD-F       | 5'GGGGACAAGTTTGTACAAAAAAGCAGGCTTCATGAAGCCGCGGCAGTCGCAGG3'  | For pENTRY-TaEIL1-MD construction, F primer                                             |
| ENTRY-EIL1MD-R       | 5'GGGGACCACTTTGTACAAGAAAGCTGGGTTCGCGGCCACCGCGCTCCTCT3'     | For pENTRY-TaEIL1-MD construction, R primer                                             |
| ENTRY-EIL1CT-F       | 5'GGGGACAAGTTTGTACAAAAAAGCAGGCTTCATGGAGCCGGAGCTGATGCTGAA3' | For pENTRY-TaEIL1-CT construction, F primer                                             |
| EIL1-CLuc-F          | 5'CGCGGATCCAATGATGGGAGGTGGGCTGCT3'                         | For cLuc-TaEIL1 construction, F primer                                                  |
| EIL1-CLuc-R          | 5'ACGCGTGCAGTACAGTAGTACCAATTGGGGCCGTC3'                    | For cLuc-TaEIL1 construction, R primer                                                  |
| MED25-NLuc-F         | 5'CGCGGATCCAATGGTGGAGGGGATGGCTTC3'                         | For TaMED25-nLuc and TaMED25-vWF-A-nLuc constructions, F primer                         |
| MED25-NLuc-R         | 5'ACGCGTGCAGATAGGTAGCCTCCTCCAGACAT3'                       | For TaMED25-nLuc and TaMED25-Q-rich-nLuc constructions, R primer                        |
| MEDΔN-Nluc-F(Uni)    | 5'CGCGGATCCAATGTTTCATGGAGGCTCGAACAGC3'                     | For TaMED25-MD-nLuc, TaMED25-MD/ACID-nLuc and TaMED25-ACID-nLuc constructions, F primer |
| MEDΔC-Nluc-R(Uni)    | 5'ACGCGTGCAGATTGAGACCTGTGGTTTGA3'                          | For TaMED25-MD/ACID-nLuc and TaMED25-ACID-nLuc constructions, R primer                  |
| MED-ACID-Nluc-F(Uni) | 5'CACGGGGGACGAGCTCGGTACCATGTCTCGAAGTATGTCAAATTTGGG3'       | For TaMED25-ACID-nLuc construction, F primer                                            |
| MEDΔACID-SOE-F       | 5'AATGGCCAGCAACCACAGCAGCCACAGATGCAGCC3'                    | For TaMED25ΔACID-nLuc construction, F primer                                            |
| MEDΔACID-SOE-R       | 5'CATCTGTGGCTGCTGTGGTTGCTGGCCATTAGGATG3'                   | For TaMED25ΔACID-nLuc construction, R primer                                            |
| EIL1-N-CLuc-F(Uni)   | 5'CGCGGATCCAATGATGGGAGGTGGGCTGCT3'                         | For cLuc-TaEIL1-NT construction, F primer                                               |
| EIL1-N-CLuc-R(Uni)   | 5'ACGCGTGCAGTACCAAGCCGTCGCCAACGCCGC3'                      | For cLuc-TaEIL1-NT construction, R primer                                               |
| EIL1-MD-CLuc-F(Uni)  | 5'CGCGGATCCACGCATGTGGCGCGACCCGCAT3'                        | For cLuc-TaEIL1-MD construction, F primer                                               |
| EIL1-MD-CLuc-R(Uni)  | 5'ACGCGTGCAGTACAGCGGCCACCGCGCTCCTCT3'                      | For cLuc-TaEIL1-MD construction, R primer                                               |
| EIL1-C-CLuc-F(Uni)   | 5'CGCGGATCCAATGGAGCCGGAGCTGATGCTGAA3'                      | For cLuc-TaEIL1-CT construction, F primer                                               |
| EIL1-C-CLuc-R(Uni)   | 5'ACGCGTGCAGTACAGTAGTACCAATTGGGGC3'                        | For cLuc-TaEIL1-CT construction, R primer                                               |
| TaGAPDH-F            | 5'TTAGACTTGCAGAACCCAGCA3'                                  | qRT-PCR primer for internal control gene <i>TaGAPDH</i> , F primer                      |
| TaGAPDH-R            | 5'AAATGCCCTTGAGGTTTCCC3'                                   | qRT-PCR primer for internal control gene <i>TaGAPDH</i> , R primer                      |
| HvActin1-F           | 5'TGGCACCCGAGGAGCACC3'                                     | qRT-PCR primer for internal control gene <i>HvActin1</i> , F primer                     |
| HvActin1-R           | 5'GTAACCTCTCTCGGTGAG3'                                     | qRT-PCR primer for internal control gene <i>HvActin1</i> , R primer                     |
| real-TaMED25-F       | 5'TTTCTGCACCTGCATTCTCTC3'                                  | qRT-PCR assay for <i>TaMED25</i> , F primer                                             |
| real-TaMED25-R       | 5'ACCTGTTGTTGGATAGGGTTTACT3'                               | qRT-PCR assay for <i>TaMED25</i> , R primer                                             |
| real-HvMED25-F       | 5'TTTCTCAACCTGCATTCTCTC3'                                  | qRT-PCR assay for <i>HvMED25</i> , F primer                                             |
| real-HvMED25-R       | Same with the primer 'real-TaMED25-R'                      | qRT-PCR assay for <i>HvMED25</i> , R primer                                             |
| real-EIL1-F          | 5'GTGCTCACCGCTGTCATCAAG3'                                  | qRT-PCR assay for <i>TaEIL1</i> , F primer                                              |
| real-EIL1-R          | 5'GCGAGGTCAACGTCGTACTCA3'                                  | qRT-PCR assay for <i>TaEIL1</i> , R primer                                              |
| real-ERF1-F          | 5'GGAGCCACCAGTCCGTATGA3'                                   | qRT-PCR assay for <i>TaERF1</i> , F primer                                              |
| real-ERF1-R          | 5'CACCCGGCAGAGGTATTCAA3'                                   | qRT-PCR assay for <i>TaERF1</i> , R primer                                              |
| real-TaPOX2-F        | 5'AGGGGCTTCGGCGTCATC3'                                     | qRT-PCR assay for <i>TaPOX2</i> , F primer                                              |
| real-TaPOX2-R        | 5'TTGGGCGTCGTGTTCC3'                                       | qRT-PCR assay for <i>TaPOX2</i> , R primer                                              |
| real-TaADH-F         | 5'AGCCAAGGGTCAAACCTCC3'                                    | qRT-PCR assay for <i>TaADH</i> , F primer                                               |
| real-TaADH-R         | 5'GATGGTGAAGCGAGACTGC3'                                    | qRT-PCR assay for <i>TaADH</i> , R primer                                               |
| real-TaPR1-F         | 5'GAGAATGCAGACGCCCAAGC3'                                   | qRT-PCR assay for <i>TaPR1</i> , F primer                                               |
| real-TaPR1-R         | 5'CTGGAGCTTGCTCCATGTTTGCCG3'                               | qRT-PCR assay for <i>TaPR1</i> , R primer                                               |
| real-TaPR2-F         | 5'AGGATGTTGCTTCCATGTTTGCCG3'                               | qRT-PCR assay for <i>TaPR2</i> , F primer                                               |
| real-TaPR2-R         | 5'AAGTAGATGCGCATGCCGTTGATG3'                               | qRT-PCR assay for <i>TaPR2</i> , R primer                                               |
| HIS2-TaERF1pro-P1-F  | 5'GGGCGAATTCGGGGAGCTCGCAGGTGCAATTAATTTTATT3'               | For pHIS2-TaERF1pro-P1 construction, F primer                                           |
| HIS2-TaERF1pro-P1-R  | 5'TAATGCCAGGAATTTCTAGAGGGGCACATTCGTTTGGACATG3'             | For pHIS2-TaERF1pro-P1 construction, R primer                                           |
| HIS2-TaERF1pro-P2-F  | 5'GGGCGAATTCGGGGAGCTCCCATATCACATGCCACCAC3'                 | For pHIS2-TaERF1pro-P2 construction, F primer                                           |
| HIS2-TaERF1pro-P2-R  | 5'TAATGCCAGGAATTTCTAGATGTCGTCCATGCGTTCGTTG3'               | For pHIS2-TaERF1pro-P2 construction, R primer                                           |
